# Supplementary material for: Pattern of Amino Acid Substitutions in Transmembrane Domains of β-Barrel Membrane Proteins for Detecting Remote Homologs in Bacteria and Mitochondria
Source: PubMed Central journal article supplement (PMC3206045; doi:10.1371/journal.pone.0026400), 2011-11-01
Supplement: pone.0026400.s002.pdf [file pone.0026400.s002.pdf]

## Pattern of Amino Acid Substitutions in Transmembrane Domains of $\beta$ -Barrel Membrane Proteins for Detecting Remote Homologs in Bacteria and Mitochondria

David Jimenez-Morales<sup>1</sup>, Jie Liang<sup>1,\*</sup>

<sup>1</sup> Department of Bioengineering, University of Illinois at Chicago, Chicago, Illinois, United States of America.

\* E-mail: Corresponding author [jliang@uic.edu](mailto:jliang@uic.edu)

## Figure S2. The estimated instantaneous substitution rates.

**A. Estimating  $Q_{\text{all}}$ .** Instantaneous substitution rate values estimated for residues embedded within the outer membrane region ( $Q_{\text{all}}$ ). The entries  $q_{ij}$  of the rate matrix  $Q$  are substitution rates of amino acid residues for the 20 amino acids at an infinitesimally small time interval. The values are in the unit of  $\times 10^{-4}$  expected residue changes per 100 site between sequences.

#  $Q_{\text{all}}$ : Substitution rate values for the fragments embedded within the outer membrane region.  
# Scaling factor:  $q_{ij} \times 10^{-4}$

|   | S       | T       | N       | Q       | D       | E       | R       | K       | H      | C      | P      | G       | W       | Y       | F       | V        | I        | L        | A        | M       |
|---|---------|---------|---------|---------|---------|---------|---------|---------|--------|--------|--------|---------|---------|---------|---------|----------|----------|----------|----------|---------|
| S | -91.699 | 37.585  | 14.958  | 2.972   | 2.530   | 0.728   | 1.435   | 0.998   | 0.521  | 0.133  | 0.197  | 9.318   | 0.049   | 0.240   | 0.379   | 0.618    | 0.162    | 0.510    | 17.641   | 0.723   |
| T | 37.585  | -94.888 | 5.927   | 2.069   | 0.438   | 0.741   | 0.973   | 1.355   | 0.246  | 0.102  | 0.161  | 2.930   | 0.148   | 0.566   | 0.385   | 7.994    | 1.537    | 1.461    | 24.893   | 5.379   |
| N | 14.958  | 5.927   | -37.543 | 2.511   | 6.672   | 0.487   | 0.695   | 1.253   | 0.817  | 0.037  | 0.050  | 1.394   | 0.102   | 0.523   | 0.146   | 0.162    | 0.079    | 0.212    | 0.958    | 0.559   |
| Q | 2.972   | 2.069   | 2.511   | -27.419 | 1.466   | 5.979   | 2.735   | 2.551   | 3.045  | 0.133  | 0.113  | 0.307   | 0.113   | 0.345   | 0.104   | 0.576    | 0.429    | 0.444    | 0.741    | 0.786   |
| D | 2.530   | 0.438   | 6.672   | 1.466   | -17.105 | 3.365   | 0.174   | 0.350   | 0.130  | 0.030  | 0.042  | 0.556   | 0.060   | 0.123   | 0.090   | 0.151    | 0.071    | 0.400    | 0.360    | 0.096   |
| E | 0.728   | 0.741   | 0.487   | 5.979   | 3.365   | -13.688 | 0.234   | 0.234   | 0.052  | 0.019  | 0.127  | 0.443   | 0.069   | 0.132   | 0.049   | 0.218    | 0.040    | 0.142    | 0.515    | 0.114   |
| R | 1.435   | 0.973   | 0.695   | 2.735   | 0.174   | 0.234   | -14.180 | 4.802   | 1.003  | 0.061  | 0.053  | 0.300   | 0.071   | 0.335   | 0.251   | 0.223    | 0.123    | 0.361    | 0.262    | 0.089   |
| K | 0.998   | 1.355   | 1.253   | 2.551   | 0.350   | 0.234   | 4.802   | -13.533 | 0.086  | 0.029  | 0.042  | 0.208   | 0.120   | 0.123   | 0.134   | 0.100    | 0.142    | 0.266    | 0.598    | 0.143   |
| H | 0.521   | 0.246   | 0.817   | 3.045   | 0.130   | 0.052   | 1.003   | 0.086   | -9.029 | 0.007  | 0.013  | 0.124   | 0.180   | 2.050   | 0.112   | 0.085    | 0.056    | 0.295    | 0.157    | 0.049   |
| C | 0.133   | 0.102   | 0.037   | 0.133   | 0.030   | 0.019   | 0.061   | 0.029   | 0.007  | -1.104 | 0.013  | 0.055   | 0.016   | 0.188   | 0.061   | 0.071    | 0.021    | 0.052    | 0.046    | 0.029   |
| P | 0.197   | 0.161   | 0.050   | 0.113   | 0.042   | 0.127   | 0.053   | 0.042   | 0.013  | 0.013  | -2.418 | 0.122   | 0.022   | 0.053   | 0.219   | 0.042    | 0.027    | 0.175    | 0.931    | 0.016   |
| G | 9.318   | 2.930   | 1.394   | 0.307   | 0.556   | 0.443   | 0.300   | 0.208   | 0.124  | 0.055  | 0.122  | -60.010 | 0.141   | 0.305   | 0.595   | 0.633    | 0.303    | 0.855    | 40.777   | 0.643   |
| W | 0.049   | 0.148   | 0.102   | 0.113   | 0.060   | 0.069   | 0.071   | 0.120   | 0.180  | 0.016  | 0.022  | 0.141   | -17.997 | 9.304   | 3.245   | 1.482    | 0.219    | 2.228    | 0.304    | 0.125   |
| Y | 0.240   | 0.566   | 0.523   | 0.345   | 0.123   | 0.132   | 0.335   | 0.123   | 2.050  | 0.188  | 0.053  | 0.305   | 9.304   | -43.202 | 24.672  | 1.237    | 0.339    | 1.682    | 0.646    | 0.338   |
| F | 0.379   | 0.385   | 0.146   | 0.104   | 0.090   | 0.049   | 0.251   | 0.134   | 0.112  | 0.061  | 0.219  | 0.595   | 3.245   | 24.672  | -78.969 | 7.825    | 4.858    | 31.890   | 2.568    | 1.387   |
| V | 0.618   | 7.994   | 0.162   | 0.576   | 0.151   | 0.218   | 0.223   | 0.100   | 0.085  | 0.071  | 0.042  | 0.633   | 1.482   | 1.237   | 7.825   | -391.517 | 194.115  | 131.115  | 41.268   | 3.601   |
| I | 0.162   | 1.537   | 0.079   | 0.429   | 0.071   | 0.040   | 0.123   | 0.142   | 0.056  | 0.021  | 0.027  | 0.303   | 0.219   | 0.339   | 4.858   | 194.115  | -251.467 | 44.434   | 2.718    | 1.793   |
| L | 0.510   | 1.461   | 0.212   | 0.444   | 0.400   | 0.142   | 0.361   | 0.266   | 0.295  | 0.052  | 0.175  | 0.855   | 2.228   | 1.682   | 31.890  | 131.115  | 44.434   | -242.428 | 9.930    | 15.977  |
| A | 17.641  | 24.893  | 0.958   | 0.741   | 0.360   | 0.515   | 0.262   | 0.598   | 0.157  | 0.046  | 0.931  | 40.777  | 0.304   | 0.646   | 2.568   | 41.268   | 2.718    | 9.930    | -147.777 | 2.465   |
| M | 0.723   | 5.379   | 0.559   | 0.786   | 0.096   | 0.114   | 0.089   | 0.143   | 0.049  | 0.029  | 0.016  | 0.643   | 0.125   | 0.338   | 1.387   | 3.601    | 1.793    | 15.977   | 2.465    | -34.312 |

**B. Estimating  $Q_{\text{out}}$ .** Instantaneous substitution rate values estimated for the subset of residues from the transmembrane segments facing the lipid environment ( $Q_{\text{out}}$ ).

#  $Q_{\text{out}}$ : Substitution rate values for the subset of residues from the transmembrane segments facing the lipid environment  
# Scaling factor:  $q_{ij} \times 10^{-4}$

|   | S       | T       | N       | Q       | D      | E      | R      | K      | H      | C      | P      | G       | W       | Y       | F        | V        | I        | L        | A        | M       |
|---|---------|---------|---------|---------|--------|--------|--------|--------|--------|--------|--------|---------|---------|---------|----------|----------|----------|----------|----------|---------|
| S | -21.741 | 7.444   | 1.569   | 0.392   | 0.295  | 0.075  | 0.095  | 0.141  | 0.236  | 0.026  | 0.314  | 2.878   | 0.107   | 0.485   | 0.459    | 0.565    | 0.226    | 0.585    | 5.694    | 0.155   |
| T | 7.444   | -56.860 | 3.098   | 2.569   | 0.184  | 0.462  | 0.531  | 0.388  | 0.134  | 0.101  | 0.381  | 4.389   | 0.192   | 1.209   | 0.348    | 7.530    | 0.574    | 3.180    | 22.296   | 1.852   |
| N | 1.569   | 3.098   | -11.638 | 1.381   | 2.049  | 0.157  | 0.276  | 0.263  | 0.339  | 0.043  | 0.036  | 0.576   | 0.062   | 0.534   | 0.158    | 0.198    | 0.081    | 0.372    | 0.181    | 0.264   |
| Q | 0.392   | 2.569   | 1.381   | -12.734 | 0.390  | 0.783  | 0.825  | 0.421  | 2.395  | 0.070  | 0.168  | 0.189   | 0.205   | 1.428   | 0.223    | 0.415    | 0.131    | 0.288    | 0.253    | 0.206   |
| D | 0.295   | 0.184   | 2.049   | 0.390   | -5.754 | 0.297  | 0.103  | 0.273  | 0.056  | 0.022  | 0.030  | 0.618   | 0.056   | 0.366   | 0.100    | 0.126    | 0.075    | 0.540    | 0.114    | 0.058   |
| E | 0.075   | 0.462   | 0.157   | 0.783   | 0.297  | -3.888 | 0.104  | 0.020  | 0.042  | 0.011  | 0.011  | 0.227   | 0.074   | 0.209   | 0.139    | 0.357    | 0.068    | 0.346    | 0.483    | 0.022   |
| R | 0.095   | 0.531   | 0.276   | 0.825   | 0.103  | 0.104  | -5.535 | 0.546  | 0.463  | 0.019  | 0.031  | 0.293   | 0.115   | 1.108   | 0.101    | 0.191    | 0.153    | 0.362    | 0.173    | 0.045   |
| D | 0.141   | 0.388   | 0.263   | 0.421   | 0.273  | 0.020  | 0.546  | -3.532 | 0.092  | 0.010  | 0.056  | 0.121   | 0.082   | 0.290   | 0.196    | 0.124    | 0.074    | 0.267    | 0.113    | 0.055   |
| H | 0.236   | 0.134   | 0.339   | 2.395   | 0.056  | 0.042  | 0.463  | 0.092  | -8.410 | 0.017  | 0.036  | 0.088   | 0.312   | 3.050   | 0.158    | 0.132    | 0.163    | 0.465    | 0.180    | 0.053   |
| C | 0.026   | 0.101   | 0.043   | 0.070   | 0.022  | 0.011  | 0.019  | 0.010  | 0.017  | -1.396 | 0.029  | 0.072   | 0.046   | 0.340   | 0.089    | 0.231    | 0.065    | 0.085    | 0.104    | 0.019   |
| P | 0.314   | 0.381   | 0.036   | 0.168   | 0.030  | 0.011  | 0.031  | 0.056  | 0.036  | 0.029  | -3.905 | 0.452   | 0.096   | 0.077   | 0.484    | 0.134    | 0.083    | 0.470    | 0.978    | 0.037   |
| G | 2.878   | 4.389   | 0.576   | 0.189   | 0.618  | 0.227  | 0.293  | 0.121  | 0.088  | 0.072  | 0.452  | -62.493 | 0.234   | 0.725   | 1.682    | 0.933    | 0.408    | 2.405    | 45.843   | 0.359   |
| W | 0.107   | 0.192   | 0.062   | 0.205   | 0.056  | 0.074  | 0.115  | 0.082  | 0.312  | 0.046  | 0.096  | 0.234   | -34.252 | 18.012  | 5.363    | 3.532    | 0.550    | 4.395    | 0.595    | 0.223   |
| Y | 0.485   | 1.209   | 0.534   | 1.428   | 0.366  | 0.209  | 1.108  | 0.290  | 3.050  | 0.340  | 0.077  | 0.725   | 18.012  | -55.681 | 19.511   | 1.881    | 0.600    | 3.807    | 1.434    | 0.615   |
| F | 0.459   | 0.348   | 0.158   | 0.223   | 0.100  | 0.139  | 0.101  | 0.196  | 0.158  | 0.089  | 0.484  | 1.682   | 5.363   | 19.511  | -136.508 | 21.602   | 9.725    | 65.440   | 7.203    | 3.528   |
| V | 0.565   | 7.530   | 0.198   | 0.415   | 0.126  | 0.357  | 0.191  | 0.124  | 0.132  | 0.231  | 0.134  | 0.933   | 3.532   | 1.881   | 21.602   | -548.101 | 275.106  | 168.339  | 61.303   | 5.402   |
| I | 0.226   | 0.574   | 0.081   | 0.131   | 0.075  | 0.068  | 0.153  | 0.074  | 0.163  | 0.065  | 0.083  | 0.408   | 0.550   | 0.600   | 9.725    | 275.106  | -381.698 | 81.834   | 7.808    | 3.972   |
| L | 0.585   | 3.180   | 0.372   | 0.288   | 0.540  | 0.346  | 0.362  | 0.267  | 0.465  | 0.085  | 0.470  | 2.405   | 4.395   | 3.807   | 65.440   | 168.339  | 81.834   | -365.387 | 16.480   | 15.727  |
| A | 5.694   | 22.296  | 0.181   | 0.253   | 0.114  | 0.483  | 0.173  | 0.113  | 0.180  | 0.104  | 0.978  | 45.843  | 0.595   | 1.434   | 7.203    | 61.303   | 7.808    | 16.480   | -173.182 | 1.947   |
| M | 0.155   | 1.852   | 0.264   | 0.206   | 0.058  | 0.022  | 0.045  | 0.055  | 0.053  | 0.019  | 0.037  | 0.359   | 0.223   | 0.615   | 3.528    | 5.402    | 3.972    | 15.727   | 1.947    | -34.540 |

**C. Estimating  $Q_{in}$ .** Instantaneous substitution rate values estimated for the subset of residues from the transmembrane segments facing the interior of the barrel ( $Q_{in}$ ).

#  $Q_{in}$ : Substitution rate values for the subset of residues from the transmembrane segments facing the interior of the barrel  
# Unit:  $q_{ij} \times 10^{-04}$

|   | S        | T        | N       | Q       | D       | E       | R       | K       | H      | C      | P      | G       | W      | Y       | F       | V       | I       | L       | A        | M       |
|---|----------|----------|---------|---------|---------|---------|---------|---------|--------|--------|--------|---------|--------|---------|---------|---------|---------|---------|----------|---------|
| S | -187.806 | 76.525   | 25.615  | 5.620   | 4.276   | 2.347   | 3.360   | 1.567   | 1.069  | 0.270  | 0.513  | 19.043  | 0.493  | 0.397   | 0.681   | 2.342   | 0.885   | 0.796   | 37.999   | 4.010   |
| T | 76.525   | -146.250 | 9.066   | 4.168   | 1.006   | 1.433   | 1.399   | 2.166   | 0.536  | 0.130  | 0.232  | 1.416   | 0.204  | 1.582   | 1.434   | 12.145  | 3.521   | 1.788   | 22.943   | 4.557   |
| N | 25.615   | 9.066    | -64.924 | 3.878   | 9.932   | 0.719   | 0.825   | 2.727   | 1.206  | 0.145  | 0.225  | 3.216   | 0.330  | 0.763   | 0.216   | 0.630   | 0.192   | 0.901   | 3.060    | 1.279   |
| Q | 5.620    | 4.168    | 3.878   | -56.578 | 3.627   | 19.786  | 3.569   | 5.042   | 1.264  | 0.165  | 0.180  | 0.538   | 0.203  | 0.584   | 0.282   | 1.558   | 1.307   | 2.204   | 1.796    | 0.809   |
| D | 4.276    | 1.006    | 9.932   | 3.627   | -41.038 | 14.389  | 0.352   | 0.291   | 0.207  | 0.048  | 0.136  | 2.966   | 0.159  | 0.248   | 0.383   | 0.482   | 0.134   | 0.893   | 1.136    | 0.372   |
| E | 2.347    | 1.433    | 0.719   | 19.786  | 14.389  | -47.877 | 0.356   | 0.428   | 0.168  | 0.220  | 0.278  | 1.002   | 0.443  | 0.311   | 0.203   | 1.886   | 0.184   | 0.440   | 2.496    | 0.788   |
| R | 3.360    | 1.399    | 0.825   | 3.569   | 0.352   | 0.356   | -23.582 | 7.702   | 1.449  | 0.174  | 0.076  | 0.876   | 0.085  | 0.302   | 0.587   | 0.717   | 0.220   | 0.692   | 0.664    | 0.178   |
| D | 1.567    | 2.166    | 2.727   | 5.042   | 0.291   | 0.428   | 7.702   | -23.477 | 0.272  | 0.060  | 0.139  | 0.398   | 0.162  | 0.101   | 0.117   | 0.226   | 0.307   | 0.561   | 1.084    | 0.138   |
| H | 1.069    | 0.536    | 1.206   | 1.264   | 0.207   | 0.168   | 1.449   | 0.272   | -7.364 | 0.012  | 0.018  | 0.242   | 0.040  | 0.344   | 0.060   | 0.075   | 0.045   | 0.193   | 0.134    | 0.031   |
| C | 0.270    | 0.130    | 0.145   | 0.165   | 0.048   | 0.220   | 0.174   | 0.050   | 0.012  | -1.861 | 0.007  | 0.150   | 0.016  | 0.181   | 0.029   | 0.067   | 0.019   | 0.038   | 0.118    | 0.020   |
| P | 0.513    | 0.232    | 0.225   | 0.180   | 0.136   | 0.278   | 0.076   | 0.139   | 0.018  | 0.007  | -3.094 | 0.234   | 0.066  | 0.116   | 0.053   | 0.065   | 0.038   | 0.087   | 0.593    | 0.039   |
| G | 19.043   | 1.416    | 3.216   | 0.538   | 2.966   | 1.002   | 0.876   | 0.398   | 0.242  | 0.150  | 0.234  | -83.068 | 0.331  | 0.302   | 0.268   | 0.616   | 0.337   | 0.561   | 50.062   | 0.509   |
| W | 0.493    | 0.204    | 0.330   | 0.203   | 0.159   | 0.443   | 0.085   | 0.162   | 0.040  | 0.016  | 0.066  | 0.331   | -3.887 | 0.737   | 0.111   | 0.063   | 0.052   | 0.132   | 0.188    | 0.071   |
| Y | 0.397    | 1.582    | 0.763   | 0.584   | 0.248   | 0.311   | 0.302   | 0.101   | 0.344  | 0.181  | 0.116  | 0.302   | 0.737  | -28.516 | 21.291  | 0.310   | 0.246   | 0.265   | 0.259    | 0.178   |
| F | 0.681    | 1.434    | 0.216   | 0.282   | 0.383   | 0.203   | 0.587   | 0.117   | 0.060  | 0.029  | 0.053  | 0.268   | 0.111  | 21.291  | -29.099 | 0.302   | 0.356   | 1.117   | 0.427    | 1.184   |
| V | 2.342    | 12.145   | 0.630   | 1.558   | 0.482   | 1.886   | 0.717   | 0.226   | 0.075  | 0.067  | 0.065  | 0.616   | 0.063  | 0.310   | 0.302   | -53.401 | 15.204  | 7.038   | 8.938    | 0.737   |
| I | 0.885    | 3.521    | 0.192   | 1.307   | 0.134   | 0.184   | 0.220   | 0.307   | 0.045  | 0.019  | 0.038  | 0.337   | 0.052  | 0.246   | 0.356   | 15.204  | -28.079 | 2.607   | 1.458    | 0.967   |
| L | 0.796    | 1.788    | 0.901   | 2.204   | 0.893   | 0.440   | 0.692   | 0.561   | 0.193  | 0.038  | 0.087  | 0.561   | 0.132  | 0.265   | 1.117   | 7.038   | 2.607   | -32.970 | 7.617    | 5.037   |
| A | 37.999   | 22.943   | 3.060   | 1.796   | 1.136   | 2.496   | 0.664   | 1.084   | 0.134  | 0.118  | 0.593  | 50.062  | 0.188  | 0.259   | 0.427   | 8.938   | 1.458   | 7.617   | -143.667 | 2.696   |
| M | 4.010    | 4.557    | 1.279   | 0.809   | 0.372   | 0.788   | 0.178   | 0.138   | 0.031  | 0.020  | 0.039  | 0.509   | 0.071  | 0.178   | 1.184   | 0.737   | 0.967   | 5.037   | 2.696    | -23.602 |
