# Supplementary material for: Pattern of Amino Acid Substitutions in Transmembrane Domains of β-Barrel Membrane Proteins for Detecting Remote Homologs in Bacteria and Mitochondria
Source: PubMed Central journal article supplement (PMC3206045; doi:10.1371/journal.pone.0026400), 2011-11-01
Supplement: pone.0026400.s003.pdf [file pone.0026400.s003.pdf]

## Pattern of Amino Acid Substitutions in Transmembrane Domains of $\beta$ -Barrel Membrane Proteins for Detecting Remote Homologs in Bacteria and Mitochondria

David Jimenez-Morales<sup>1</sup>, Jie Liang<sup>1,\*</sup>

<sup>1</sup> Department of Bioengineering, University of Illinois at Chicago, Chicago, Illinois, United States of America.

\* E-mail: Corresponding author [jliang@uic.edu](mailto:jliang@uic.edu)

### Figure S3. The BBTM scoring matrices.

**A. Scoring matrix bbTM<sub>all</sub>.** Scoring matrix at evolutionary time unit of 40 derived from  $Q_{all}$ . Note: The last line denotes the lowest score in all columns and rows to conform with format of BLOSUM and PAM for use in programs such as CLUSTALW.

```
# bbTMall
# Lowest score = -24 , Highest score = 24
  A  R  N  D  C  Q  E  G  H  I  L  K  M  F  P  S  T  W  Y  V  B  Z  X  *
A  6 -11 -7 -10 -19 -9 -10  1 -12 -2 -2 -9 -5 -5 -8 -1  0 -10 -10  0 -8 -4 -6 -24
R -11 10 -7 -11 -13 -4 -10 -12 -5 -12 -11 -1 -12 -11 -14 -6 -8 -14 -11 -12 -9 -11 -8 -24
N -7 -7 10  0 -13 -4 -8 -7 -6 -12 -12 -5 -7 -12 -14  0 -2 -13 -10 -11  5 -7 -7 -24
D -10 -11  0 11 -13 -5 -2 -10 -10 -13 -11 -9 -12 -14 -14 -4 -8 -14 -14 -12  6 -6 -8 -24
C -16 -13 -14 -14 24 -11 -16 -16 -16 -15 -16 -14 -13 -14 -14 -12 -13 -16 -12 -15 -14 -16 -12 -24
Q -9 -4 -4 -5 -11 10 -1 -11 -2 -9 -10 -4 -7 -13 -12 -4 -5 -13 -11 -9 -4 -6 -6 -24
E -10 -10 -8 -2 -24 -1 10 -11 -12 -14 -13 -10 -12 -15 -11 -8 -8 -14 -14 -12 -5 -0 -9 -24
G  1 -12 -7 -10 -24 -11 -11  7 -14 -8 -8 -12 -8 -10 -13 -2 -4 -13 -12 -6 -8 -2 -8 -24
H -12 -5 -6 -10 -24 -2 -12 -14 13 -13 -12 -11 -12 -11 -16 -9 -10 -10 -5 -13 -8 -13 -9 -24
I -2 -12 -12 -13 -17 -9 -14 -8 -13  7  3 -12 -3 -2 -14 -9 -5 -8 -9  5 -12 -11 -7 -24
L -2 -11 -12 -11 -18 -10 -13 -8 -12  3  6 -12  0  1 -13 -9 -6 -6 -6  3 -11 -10 -6 -24
K -9 -1 -5 -9 -13 -4 -10 -12 -11 -12 -12 11 -11 -13 -14 -7 -6 -12 -14 -12 -7 -11 -8 -24
M -5 -12 -7 -12 -13 -7 -12 -8 -12 -3  0 -11 12 -5 -15 -7 -2 -10 -10 -2 -9 -10 -7 -24
F -5 -11 -12 -14 -13 -13 -15 -10 -11 -2  1 -13 -5  8 -11 -10 -9 -3  1 -1 -13 -12 -7 -24
P -8 -14 -14 -14 -13 -12 -11 -13 -16 -15 -13 -14 -15 -11 14 -11 -12 -16 -16 -13 -14 -12 -11 -24
S -1 -6  0 -4 -13 -4 -8 -2 -9 -9 -9 -7 -7 -10 -11  8  2 -15 -12 -7 -2 -5 -6 -24
T  0 -8 -2 -8 -13 -5 -8 -4 -10 -5 -6 -2 -9 -12  2  8 -12 -10 -3 -5 -6 -5 -24
W -10 -14 -13 -14 -22 -13 -14 -13 -10 -8 -6 -12 -10 -3 -16 -15 -12 11 -1 -6 -13 -13 -10 -24
Y -10 -11 -10 -14 -13 -11 -14 -12 -5 -9 -6 -14 -10  1 -15 -12 -10 -1  7 -8 -12 -13 -8 -24
V  0 -12 -11 -12 -14 -9 -12 -6 -13  5  3 -12 -2 -1 -13 -7 -3 -6 -8  5 -11 -9 -6 -24
B -8 -9  5  6 -14 -4 -5 -8 -8 -12 -11 -7 -9 -13 -14 -2 -5 -13 -12 -11 11 -4 -7 -24
Z -4 -11 -7 -6 -16 -6 -0 -2 -13 -11 -10 -11 -10 -12 -12 -5 -6 -13 -13 -9 -4 10 -7 -24
X -6 -8 -7 -8 -12 -6 -9 -8 -9 -7 -6 -8 -7 -7 -11 -6 -5 -10 -8 -6 -7 -7  1 -24
* -24 -24 -24 -24 -24 -24 -24 -24 -24 -24 -24 -24 -24 -24 -24 -24 -24 -24 -24 -24 -24 -24 -24  1
```

**B. Scoring matrix bbTM<sub>out</sub>.** Scoring matrix at evolutionary time unit of 40 derived from  $Q_{out}$ .

```
# bbTMout
# Lowest score = -16 , Highest score = 25
  A  R  N  D  C  Q  E  G  H  I  L  K  M  F  P  S  T  W  Y  V  B  Z  X  *
A  6 -12 -11 -13 -12 -11 -10  1 -13 -1 -1 -13 -5 -3 -8 -3  0 -9 -8  0 -12 -4 -6 -16
R -12 14 -7 -9 -12 -5 -8 -10 -6 -12 -12 -4 -13 -13 -14 -11 -8 -12 -8 -12 -8 -9 -8 -16
N -11 -7 13 -1 -12 -3 -8 -9 -7 -13 -12 -7 -8 -12 -14 -3 -3 -14 -10 -12  6 -8 -7 -16
D -13 -9 -1 14 -12 -7 -5 -8 -12 -13 -11 -6 -12 -13 -14 -8 -11 -14 -11 -13  7 -6 -8 -16
C -14 -13 -11 -12 25 -11 -11 -14 -14 -14 -15 -14 -14 -14 -13 -14 -12 -14 -11 -13 -11 -12 -11 -16
Q -11 -5 -3 -7 -10 12 -4 -12 -2 -12 -12 -6 -9 -12 -10 -8 -4 -10 -8 -11 -5 -8 -7 -16
E -10 -8 -8 -5 -12 -4 17 -11 -12 -12 -12 -13 -14 -12 -16 -11 -8 -13 -13 -11 -6  3 -9 -16
G  1 -10 -9 -8 -12 -12 -11  8 -14 -6 -6 -13 -9 -7 -9 -4 -3 -11 -10 -5 -8 -1 -7 -16
H -13 -6 -7 -12 -12 -2 -12 -14 13 -12 -12 -10 -13 -11 -14 -9 -12 -9 -5 -13 -9 -13 -9 -16
I -1 -12 -13 -13 -13 -12 -12 -6 -12  5  2 -14 -3 -1 -13 -9 -5 -6 -8  3 -13 -9 -7 -16
L -1 -12 -12 -11 -15 -12 -12 -6 -12  2  4 -13 -2  1 -11 -9 -5 -5 -6  2 -11 -9 -6 -16
K -13 -4 -7 -6 -12 -6 -13 -13 -10 -14 -13 14 -12 -12 -12 -10 -9 -13 -12 -13 -6 -13 -9 -16
M -5 -13 -8 -12 -12 -9 -14 -9 -13 -3 -2 -12 12 -3 -13 -10 -4 -9 -9 -3 -10 -11 -7 -16
F -3 -13 -12 -13 -12 -12 -12 -7 -11 -1  1 -12 -3  6 -10 -10 -8 -3 -2  0 -12 -9 -6 -16
P -8 -14 -14 -14 -12 -10 -16 -9 -14 -13 -11 -12 -14 -10 12 -8 -9 -13 -15 -12 -14 -12 -10 -16
S -3 -11 -3 -8 -12 -8 -11 -4 -9 -9 -9 -10 -10 -10 -8 11 -1 -12 -11 -8 -5 -7 -7 -16
T  0 -8 -3 -11 -12 -4 -8 -3 -12 -5 -5 -9 -4 -8 -9 -1  9 -11 -8 -3 -7 -5 -5 -16
W -9 -12 -14 -14 -12 -10 -13 -11 -9 -6 -5 -13 -9 -3 -13 -12 -11  9 -1 -5 -14 -12 -8 -16
Y -8 -8 -10 -11 -12 -8 -13 -10 -5 -8 -6 -12 -9 -2 -15 -11 -8 -1  6 -7 -10 -11 -7 -16
V  0 -12 -12 -13 -13 -11 -11 -5 -13  3  2 -13 -3  0 -12 -8 -3 -5 -7  4 -12 -8 -6 -16
B -12 -8  6  7 -11 -5 -6 -8 -9 -13 -11 -6 -10 -12 -14 -5 -7 -14 -10 -12 14 -5 -8 -16
Z -4 -9 -8 -6 -12 -8  3 -1 -13 -9 -9 -13 -11 -9 -12 -7 -5 -12 -11 -8 -5 15 -8 -16
X -6 -8 -7 -8 -11 -7 -9 -7 -9 -7 -6 -9 -7 -6 -10 -7 -5 -8 -7 -6 -8 -8  1 -16
* -16 -16 -16 -16 -16 -16 -16 -16 -16 -16 -16 -16 -16 -16 -16 -16 -16 -16 -16 -16 -16 -16 -16  1
```

**C. Scoring matrix bbTM<sub>in</sub>.** Scoring matrix at evolutionary time unit of 36 derived from  $Q_{in}$ .

```
#bbTMin
# Lowest score = -14 , Highest score = 23
  A  R  N  D  C  Q  E  G  H  I  L  K  M  F  P  S  T  W  Y  V  B  Z  X  *
A  7 -9 -4 -7 -14 -7 -6  1 -12 -6 -3 -8 -5 -10 -9  0  0 -12 -12 -2 -5 -2 -5 -14
R -9  8 -8 -11 -12 -5 -11 -10 -6 -11 -9 -2 -12 -9 -14 -6 -7 -14 -11 -8 -9 -10 -8 -14
N -4  8  8 -1 -12 -4 -8 -6 -6 -10 -8 -5 -6 -11 -11  0 -2 -10 -9 -8  4 -7 -6 -14
D -7 -11 -1  9 -14 -4  0 -6 -10 -12 -7 -10 -9 -10 -12 -5 -7 -11 -11 -8  4 -3 -7 -14
C -13 -12 -12 -14 23 -12 -11 -14 -14 -14 -14 -14 -14 -14 -14 -12 -13 -14 -11 -12 -13 -12 -11 -14
Q -7 -5 -4 -4 -12  8  0 -10 -6 -6 -5 -3 -8 -11 -12 -4 -5 -11 -10 -6 -4 -5 -6 -14
E -6 -11 -8  0 -11  0  8 -9 -12 -11 -10 -10 -8 -12 -11 -7 -7 -10 -11 -6 -4 -0 -7 -14
G  1 -10 -6 -6 -14 -10 -9  6 -13 -11 -9 -11 -9 -13 -13 -2 -5 -12 -13 -8 -6 -1 -8 -14
H -12 -6 -6 -10 -14 -6 -12 -13 14 -13 -10 -10 -14 -13 -14 -8 -9 -13 -9 -12 -8 -12 -9 -14
I -6 -11 -10 -12 -14 -6 -11 -11 -13 12 -3 -10 -5 -8 -13 -8 -4 -13 -10  3 -11 -11 -7 -14
L -3 -9 -8 -7 -14 -5 -10 -9 -10 -3 10 -9 -1 -6 -12 -8 -6 -12 -11 -1 -7 -9 -6 -14
K -8 -2 -5 -10 -14 -3 -10 -11 -10 -10 -9  9 -12 -13 -12 -7 -6 -12 -14 -10 -7 -10 -8 -14
M -5 -12 -6 -9 -14 -8 -8 -9 -14 -5 -1 -12 12 -5 -13 -4 -3 -12 -11 -6 -7 -8 -7 -14
F -10 -9 -11 -10 -14 -11 -12 -13 -13 -8 -6 -13 -5 11 -13 -9 -7 -11  2 -9 -10 -12 -8 -14
P -9 -14 -11 -12 -14 -12 -11 -12 -14 -13 -12 -12 -13 -13 16 -10 -11 -11 -12 -12 -11 -11 -10 -14
S  0 -6  0 -5 -12 -4 -7 -2 -8 -8 -8 -7 -4 -9 -10  6  2 -10 -11 -5 -2 -4 -5 -14
T  0 -7 -2 -7 -14 -5 -7 -5 -9 -4 -6 -6 -3 -7 -11  2  7 -12 -7 -1 -4 -6 -5 -14
W -12 -14 -10 -11 -14 -11 -10 -12 -13 -13 -12 -12 -12 -11 -11 -10 -12 13 -7 -13 -10 -11 -10 -14
Y -12 -11 -9 -11 -11 -10 -11 -13 -9 -10 -11 -14 -11  2 -12 -11 -7 -7  9 -10 -10 -12 -8 -14
V -2 -8 -8 -8 -12 -6 -6 -8 -12  3 -1 -10 -6 -9 -12 -5 -1 -13 -10 11 -8 -7 -6 -14
B -5 -9  4  4 -13 -4 -4 -6 -8 -11 -7 -7 -7 -10 -11 -2 -4 -10 -10 -8  9 -4 -6 -14
Z -2 -10 -7 -3 -12 -5 -0 -1 -12 -11 -9 -10 -8 -12 -11 -4 -6 -11 -12 -7 -4  8 -6 -14
X -5 -8 -6 -7 -11 -6 -7 -8 -9 -7 -6 -8 -7 -8 -10 -5 -5 -10 -8 -6 -6 -6  1 -14
* -14 -14 -14 -14 -14 -14 -14 -14 -14 -14 -14 -14 -14 -14 -14 -14 -14 -14 -14 -14 -14 -14 -14  1
```
